# Supplementary material
Source: ML conference proceedings conference paper supplement (https://proceedings.mlr.press/v51/asteris16.html)
Supplement: Supplementary file 2 [file asteris16-supp.pdf]

## A Bilinear Maximization Guarantees

**Lemma 3.2.** For any real  $m \times n$ , rank- $r$  matrix  $\tilde{\mathbf{A}}$  and arbitrary norm-bounded sets  $\mathcal{X} \subset \mathbb{R}^{m \times k}$  and  $\mathcal{Y} \subset \mathbb{R}^{n \times k}$ , let

$$(\tilde{\mathbf{X}}_*, \tilde{\mathbf{Y}}_*) \triangleq \arg \max_{\mathbf{X} \in \mathcal{X}, \mathbf{Y} \in \mathcal{Y}} \text{Tr}(\mathbf{X}^\top \tilde{\mathbf{A}} \mathbf{Y}).$$

If there exist operators  $P_{\mathcal{X}} : \mathbb{R}^{m \times k} \rightarrow \mathcal{X}$  such that

$$P_{\mathcal{X}}(\mathbf{L}) = \arg \max_{\mathbf{X} \in \mathcal{X}} \text{Tr}(\mathbf{X}^\top \mathbf{L})$$

and similarly,  $P_{\mathcal{Y}} : \mathbb{R}^{n \times k} \rightarrow \mathcal{Y}$  such that

$$P_{\mathcal{Y}}(\mathbf{R}) = \arg \max_{\mathbf{Y} \in \mathcal{Y}} \text{Tr}(\mathbf{R}^\top \mathbf{Y})$$

with running times  $T_{\mathcal{X}}$  and  $T_{\mathcal{Y}}$ , respectively, then Algorithm 1 outputs  $\tilde{\mathbf{X}} \in \mathcal{X}$  and  $\tilde{\mathbf{Y}} \in \mathcal{Y}$  such that

$$\text{Tr}(\tilde{\mathbf{X}}^\top \tilde{\mathbf{A}} \tilde{\mathbf{Y}}) \geq \text{Tr}(\tilde{\mathbf{X}}_*^\top \tilde{\mathbf{A}} \tilde{\mathbf{Y}}_*) - 2\epsilon\sqrt{k} \cdot \|\tilde{\mathbf{A}}\|_2 \cdot \mu_{\mathcal{X}} \cdot \mu_{\mathcal{Y}},$$

where  $\mu_{\mathcal{X}} \triangleq \max_{\mathbf{X} \in \mathcal{X}} \|\mathbf{X}\|_F$  and  $\mu_{\mathcal{Y}} \triangleq \max_{\mathbf{Y} \in \mathcal{Y}} \|\mathbf{Y}\|_F$ , in time  $O((2\sqrt{r}/\epsilon)^{r \cdot k} \cdot (T_{\mathcal{X}} + T_{\mathcal{Y}} + (m+n)r)) + T_{\text{svd}}(r)$ .

*Proof.* In the sequel,  $\tilde{\mathbf{U}}$ ,  $\tilde{\mathbf{\Sigma}}$  and  $\tilde{\mathbf{V}}$  are used to denote the  $r$ -truncated singular value decomposition of  $\tilde{\mathbf{A}}$ .

Without loss of generality, we assume that  $\mu_{\mathcal{X}} = \mu_{\mathcal{Y}} = 1$  since the variables in  $\mathcal{X}$  and  $\mathcal{Y}$  can be normalized by  $\mu_{\mathcal{X}}$  and  $\mu_{\mathcal{Y}}$ , respectively, while simultaneously scaling the singular values of  $\tilde{\mathbf{A}}$  by a factor of  $\mu_{\mathcal{X}} \cdot \mu_{\mathcal{Y}}$ . Then,  $\|\mathbf{Y}\|_{\infty,2} \leq 1$ ,  $\forall \mathbf{Y} \in \mathcal{Y}$ , where  $\|\mathbf{Y}\|_{\infty,2}$  denotes the maximum of the  $\ell_2$ -norm of the columns of  $\mathbf{Y}$ .

Let  $\tilde{\mathbf{X}}_*, \tilde{\mathbf{Y}}_*$  be the optimal pair on  $\tilde{\mathbf{A}}$ , i.e.,

$$(\tilde{\mathbf{X}}_*, \tilde{\mathbf{Y}}_*) \triangleq \arg \max_{\mathbf{X} \in \mathcal{X}, \mathbf{Y} \in \mathcal{Y}} \text{Tr}(\mathbf{X}^\top \tilde{\mathbf{A}} \mathbf{Y})$$

and define the  $r \times k$  matrix  $\tilde{\mathbf{C}}_* \triangleq \tilde{\mathbf{V}}^\top \tilde{\mathbf{Y}}_*$ . Note that

$$\begin{aligned} \|\tilde{\mathbf{C}}_*\|_{\infty,2} &= \|\tilde{\mathbf{V}}^\top \tilde{\mathbf{Y}}_*\|_{\infty,2} \\ &= \max_{1 \leq i \leq k} \|\tilde{\mathbf{V}}^\top [\tilde{\mathbf{Y}}_*]_{:,i}\|_2 \leq 1, \end{aligned} \quad (14)$$

with the last inequality following from the facts that  $\|\mathbf{Y}\|_{\infty,2} \leq 1 \forall \mathbf{Y} \in \mathcal{Y}$  and the columns of  $\tilde{\mathbf{V}}$  are orthonormal. Alg. 1 iterates over the points in  $(\mathbb{B}_2^{r-1})^{\otimes k}$ . The latter is used to describe the set of  $r \times k$  matrices whose columns have  $\ell_2$  norm at most equal to 1. At each point, the algorithm computes a candidate solution. By (14), the  $\epsilon$ -net contains an  $r \times k$  matrix  $\mathbf{C}_\#$  such that

$$\|\mathbf{C}_\# - \tilde{\mathbf{C}}_*\|_{\infty,2} \leq \epsilon.$$

Let  $\mathbf{X}_\#, \mathbf{Y}_\#$  be the candidate pair computed at  $\mathbf{C}_\#$  by the two step maximization, i.e.,

$$\mathbf{X}_\# \triangleq \arg \max_{\mathbf{X} \in \mathcal{X}} \text{Tr}(\mathbf{X}^\top \tilde{\mathbf{U}} \tilde{\mathbf{\Sigma}} \mathbf{C}_\#)$$

and

$$\mathbf{Y}_\# \triangleq \arg \max_{\mathbf{Y} \in \mathcal{Y}} \text{Tr}(\mathbf{X}_\#^\top \tilde{\mathbf{A}} \mathbf{Y}). \quad (15)$$

We show that the objective values achieved by the candidate pair  $\mathbf{X}_\#, \mathbf{Y}_\#$  satisfies the inequality of the lemma implying the desired result.

By the definition of  $\tilde{\mathbf{C}}_*$  and the linearity of the trace,

$$\begin{aligned} &\text{Tr}(\tilde{\mathbf{X}}_*^\top \tilde{\mathbf{A}} \tilde{\mathbf{Y}}_*) \\ &= \text{Tr}(\tilde{\mathbf{X}}_*^\top \tilde{\mathbf{U}} \tilde{\mathbf{\Sigma}} \tilde{\mathbf{C}}_*) \\ &= \text{Tr}(\tilde{\mathbf{X}}_*^\top \tilde{\mathbf{U}} \tilde{\mathbf{\Sigma}} \mathbf{C}_\#) + \text{Tr}(\tilde{\mathbf{X}}_*^\top \tilde{\mathbf{U}} \tilde{\mathbf{\Sigma}} (\tilde{\mathbf{C}}_* - \mathbf{C}_\#)) \\ &\leq \text{Tr}(\mathbf{X}_\#^\top \tilde{\mathbf{U}} \tilde{\mathbf{\Sigma}} \mathbf{C}_\#) + \text{Tr}(\tilde{\mathbf{X}}_*^\top \tilde{\mathbf{U}} \tilde{\mathbf{\Sigma}} (\tilde{\mathbf{C}}_* - \mathbf{C}_\#)). \end{aligned} \quad (16)$$

The inequality follows from the fact that (by definition (15))  $\mathbf{X}_\#$  maximizes the first term over all  $\mathbf{X} \in \mathcal{X}$ . We compute an upper bound on the right hand side of (16). Define

$$\hat{\mathbf{Y}} \triangleq \arg \min_{\mathbf{Y} \in \mathcal{Y}} \|\tilde{\mathbf{V}}^\top \mathbf{Y} - \mathbf{C}_\#\|_{\infty,2}.$$

(We note that  $\hat{\mathbf{Y}}$  is used for the analysis and is never explicitly calculated.) Further, define the  $r \times k$  matrix  $\hat{\mathbf{C}} \triangleq \tilde{\mathbf{V}}^\top \hat{\mathbf{Y}}$ . By the linearity of the trace operator

$$\begin{aligned} &\text{Tr}(\mathbf{X}_\#^\top \tilde{\mathbf{U}} \tilde{\mathbf{\Sigma}} \mathbf{C}_\#) \\ &= \text{Tr}(\mathbf{X}_\#^\top \tilde{\mathbf{U}} \tilde{\mathbf{\Sigma}} \hat{\mathbf{C}}) + \text{Tr}(\mathbf{X}_\#^\top \tilde{\mathbf{U}} \tilde{\mathbf{\Sigma}} (\mathbf{C}_\# - \hat{\mathbf{C}})) \\ &= \text{Tr}(\mathbf{X}_\#^\top \tilde{\mathbf{U}} \tilde{\mathbf{\Sigma}} \tilde{\mathbf{V}}^\top \hat{\mathbf{Y}}) + \text{Tr}(\mathbf{X}_\#^\top \tilde{\mathbf{U}} \tilde{\mathbf{\Sigma}} (\mathbf{C}_\# - \hat{\mathbf{C}})) \\ &\leq \text{Tr}(\mathbf{X}_\#^\top \tilde{\mathbf{U}} \tilde{\mathbf{\Sigma}} \tilde{\mathbf{V}}^\top \mathbf{Y}_\#) + \text{Tr}(\mathbf{X}_\#^\top \tilde{\mathbf{U}} \tilde{\mathbf{\Sigma}} (\mathbf{C}_\# - \hat{\mathbf{C}})) \\ &= \text{Tr}(\mathbf{X}_\#^\top \tilde{\mathbf{A}} \mathbf{Y}_\#) + \text{Tr}(\mathbf{X}_\#^\top \tilde{\mathbf{U}} \tilde{\mathbf{\Sigma}} (\mathbf{C}_\# - \hat{\mathbf{C}})). \end{aligned} \quad (17)$$

The inequality follows from the fact that (by definition (15))  $\mathbf{Y}_\#$  maximizes the first term over all  $\mathbf{Y} \in \mathcal{Y}$ . Combining (17) and (16), and rearranging the terms, we obtain

$$\begin{aligned} &\text{Tr}(\tilde{\mathbf{X}}_*^\top \tilde{\mathbf{A}} \tilde{\mathbf{Y}}_*) - \text{Tr}(\mathbf{X}_\#^\top \tilde{\mathbf{A}} \mathbf{Y}_\#) \\ &\leq \text{Tr}(\tilde{\mathbf{X}}_*^\top \tilde{\mathbf{U}} \tilde{\mathbf{\Sigma}} (\tilde{\mathbf{C}}_* - \mathbf{C}_\#)) + \text{Tr}(\mathbf{X}_\#^\top \tilde{\mathbf{U}} \tilde{\mathbf{\Sigma}} (\mathbf{C}_\# - \hat{\mathbf{C}})). \end{aligned} \quad (18)$$

By Lemma C.10,

$$\begin{aligned} &|\text{Tr}(\tilde{\mathbf{X}}_*^\top \tilde{\mathbf{U}} \tilde{\mathbf{\Sigma}} (\tilde{\mathbf{C}}_* - \mathbf{C}_\#))| \\ &\leq \|\tilde{\mathbf{X}}_*^\top \tilde{\mathbf{U}}\|_F \cdot \|\tilde{\mathbf{\Sigma}}\|_2 \cdot \|\tilde{\mathbf{C}}_* - \mathbf{C}_\#\|_F \\ &\leq \|\tilde{\mathbf{X}}_*\|_F \cdot \sigma_1(\tilde{\mathbf{A}}) \cdot \sqrt{k} \cdot \epsilon \\ &\leq \max_{\mathbf{X} \in \mathcal{X}} \|\mathbf{X}\|_F \cdot \sigma_1(\tilde{\mathbf{A}}) \cdot \sqrt{k} \cdot \epsilon \\ &\leq \sigma_1(\tilde{\mathbf{A}}) \cdot \sqrt{k} \cdot \epsilon. \end{aligned} \quad (19)$$

Similarly,

$$\begin{aligned} |\text{Tr}(\mathbf{X}_\#^\top \tilde{\mathbf{U}} \tilde{\Sigma} (\mathbf{C}_\# - \hat{\mathbf{C}}))| &\leq \|\mathbf{X}_\# \tilde{\mathbf{U}}\|_F \cdot \|\tilde{\Sigma}\|_2 \cdot \|\mathbf{C}_\# - \hat{\mathbf{C}}\|_F \\ &\leq \max_{\mathbf{X} \in \mathcal{X}} \|\mathbf{X}\|_F \cdot \sigma_1(\tilde{\mathbf{A}}) \cdot \sqrt{k} \cdot \epsilon \\ &\leq \sigma_1(\tilde{\mathbf{A}}) \cdot \sqrt{k} \cdot \epsilon. \end{aligned} \quad (20)$$

The second inequality follows from the fact that by the definition of  $\hat{\mathbf{C}}$ ,

$$\begin{aligned} \|\hat{\mathbf{C}} - \mathbf{C}_\# \|_{\infty,2} &= \|\tilde{\mathbf{V}}^\top \hat{\mathbf{Y}} - \mathbf{C}_\# \|_{\infty,2} \leq \|\tilde{\mathbf{V}}^\top \tilde{\mathbf{Y}}_\star - \mathbf{C}_\# \|_{\infty,2} \\ &= \|\tilde{\mathbf{C}}_\star - \mathbf{C}_\# \|_{\infty,2} \leq \epsilon, \end{aligned}$$

which implies that

$$\|\hat{\mathbf{C}} - \mathbf{C}_\# \|_F \leq \sqrt{k} \cdot \epsilon.$$

Continuing from (18) under (19) and (20),

$$\text{Tr}(\mathbf{X}_\#^\top \tilde{\mathbf{A}} \mathbf{Y}_\#) \geq \text{Tr}(\tilde{\mathbf{X}}_\star^\top \tilde{\mathbf{A}} \tilde{\mathbf{Y}}_\star) - 2 \cdot \epsilon \cdot \sqrt{k} \cdot \sigma_1(\tilde{\mathbf{A}}).$$

Recalling that the singular values of  $\tilde{\mathbf{A}}$  have been scaled by a factor of  $\mu_{\mathcal{X}} \cdot \mu_{\mathcal{Y}}$  yields the desired result.

The runtime of Alg. 1 follows from the cost per iteration and the cardinality of the  $\epsilon$ -net. Matrix multiplications can exploit the truncated singular value decomposition of  $\tilde{\mathbf{A}}$  which is performed only once.  $\square$

**Lemma A.6.** *For any  $\mathbf{A}, \tilde{\mathbf{A}} \in \mathbb{R}^{m \times n}$ , and norm-bounded sets  $\mathcal{X} \subseteq \mathbb{R}^{m \times k}$  and  $\mathcal{Y} \subseteq \mathbb{R}^{n \times k}$ , let*

$$(\mathbf{X}_\star, \mathbf{Y}_\star) \triangleq \arg \max_{\mathbf{X} \in \mathcal{X}, \mathbf{Y} \in \mathcal{Y}} \text{Tr}(\mathbf{X}^\top \mathbf{A} \mathbf{Y}),$$

and

$$(\tilde{\mathbf{X}}_\star, \tilde{\mathbf{Y}}_\star) \triangleq \arg \max_{\mathbf{X} \in \mathcal{X}, \mathbf{Y} \in \mathcal{Y}} \text{Tr}(\mathbf{X}^\top \tilde{\mathbf{A}} \mathbf{Y}).$$

For any  $(\tilde{\mathbf{X}}, \tilde{\mathbf{Y}}) \in \mathcal{X} \times \mathcal{Y}$  such that

$$\text{Tr}(\tilde{\mathbf{X}}^\top \tilde{\mathbf{A}} \tilde{\mathbf{Y}}) \geq \gamma \cdot \text{Tr}(\tilde{\mathbf{X}}_\star^\top \tilde{\mathbf{A}} \tilde{\mathbf{Y}}_\star) - C$$

for some  $0 < \gamma \leq 1$ , we have

$$\begin{aligned} \text{Tr}(\tilde{\mathbf{X}}^\top \mathbf{A} \tilde{\mathbf{Y}}) &\geq \gamma \cdot \text{Tr}(\mathbf{X}_\star^\top \mathbf{A} \mathbf{Y}_\star) - C \\ &\quad - 2 \cdot \|\mathbf{A} - \tilde{\mathbf{A}}\|_2 \cdot \mu_{\mathcal{X}} \cdot \mu_{\mathcal{Y}}. \end{aligned}$$

where  $\mu_{\mathcal{X}} \triangleq \max_{\mathbf{X} \in \mathcal{X}} \|\mathbf{X}\|_F$  and  $\mu_{\mathcal{Y}} \triangleq \max_{\mathbf{Y} \in \mathcal{Y}} \|\mathbf{Y}\|_F$ .

*Proof.* By the optimality of  $\tilde{\mathbf{X}}_\star, \tilde{\mathbf{Y}}_\star$  for  $\tilde{\mathbf{A}}$ , we have

$$\text{Tr}(\tilde{\mathbf{X}}_\star^\top \tilde{\mathbf{A}} \tilde{\mathbf{Y}}_\star) \geq \text{Tr}(\mathbf{X}_\star^\top \tilde{\mathbf{A}} \mathbf{Y}_\star).$$

In turn, for any  $(\tilde{\mathbf{X}}, \tilde{\mathbf{Y}}) \in \mathcal{X} \times \mathcal{Y}$  such that

$$\text{Tr}(\tilde{\mathbf{X}}^\top \tilde{\mathbf{A}} \tilde{\mathbf{Y}}) \geq \gamma \cdot \text{Tr}(\tilde{\mathbf{X}}_\star^\top \tilde{\mathbf{A}} \tilde{\mathbf{Y}}_\star) - C$$

for some  $0 < \gamma < 1$  (if such pairs exist), we have

$$\text{Tr}(\tilde{\mathbf{X}}^\top \tilde{\mathbf{A}} \tilde{\mathbf{Y}}) \geq \gamma \cdot \text{Tr}(\mathbf{X}_\star^\top \tilde{\mathbf{A}} \mathbf{Y}_\star) - C. \quad (21)$$

By the linearity of the trace operator,

$$\begin{aligned} \text{Tr}(\tilde{\mathbf{X}}^\top \tilde{\mathbf{A}} \tilde{\mathbf{Y}}) &= \text{Tr}(\tilde{\mathbf{X}}^\top \mathbf{A} \tilde{\mathbf{Y}}) - \text{Tr}(\tilde{\mathbf{X}}^\top (\mathbf{A} - \tilde{\mathbf{A}}) \tilde{\mathbf{Y}}) \\ &\leq \text{Tr}(\tilde{\mathbf{X}}^\top \mathbf{A} \tilde{\mathbf{Y}}) + |\text{Tr}(\tilde{\mathbf{X}}^\top (\mathbf{A} - \tilde{\mathbf{A}}) \tilde{\mathbf{Y}})|. \end{aligned} \quad (22)$$

By Lemma C.10,

$$\begin{aligned} |\text{Tr}(\tilde{\mathbf{X}}^\top (\mathbf{A} - \tilde{\mathbf{A}}) \tilde{\mathbf{Y}})| &\leq \|\tilde{\mathbf{X}}\|_F \cdot \|\tilde{\mathbf{Y}}\|_F \cdot \|\mathbf{A} - \tilde{\mathbf{A}}\|_2 \\ &\leq \|\mathbf{A} - \tilde{\mathbf{A}}\|_2 \cdot \max_{\mathbf{X} \in \mathcal{X}} \|\mathbf{X}\|_F \cdot \max_{\mathbf{Y} \in \mathcal{Y}} \|\mathbf{Y}\|_F \triangleq R. \end{aligned} \quad (23)$$

Continuing from (22),

$$\text{Tr}(\tilde{\mathbf{X}}^\top \tilde{\mathbf{A}} \tilde{\mathbf{Y}}) \leq \text{Tr}(\tilde{\mathbf{X}}^\top \mathbf{A} \tilde{\mathbf{Y}}) + R. \quad (24)$$

Similarly,

$$\begin{aligned} \text{Tr}(\mathbf{X}_\star^\top \tilde{\mathbf{A}} \mathbf{Y}_\star) &= \text{Tr}(\mathbf{X}_\star^\top \mathbf{A} \mathbf{Y}_\star) - \text{Tr}(\mathbf{X}_\star^\top (\mathbf{A} - \tilde{\mathbf{A}}) \mathbf{Y}_\star) \\ &\geq \text{Tr}(\mathbf{X}_\star^\top \mathbf{A} \mathbf{Y}_\star) - |\text{Tr}(\mathbf{X}_\star^\top (\mathbf{A} - \tilde{\mathbf{A}}) \mathbf{Y}_\star)| \\ &\geq \text{Tr}(\mathbf{X}_\star^\top \mathbf{A} \mathbf{Y}_\star) - R. \end{aligned} \quad (25)$$

Combining the above, we have

$$\begin{aligned} \text{Tr}(\tilde{\mathbf{X}}^\top \mathbf{A} \tilde{\mathbf{Y}}) &\geq \text{Tr}(\tilde{\mathbf{X}}^\top \tilde{\mathbf{A}} \tilde{\mathbf{Y}}) - R \\ &\geq \gamma \cdot \text{Tr}(\mathbf{X}_\star^\top \tilde{\mathbf{A}} \mathbf{Y}_\star) - R - C \\ &\geq \gamma \cdot (\text{Tr}(\mathbf{X}_\star^\top \mathbf{A} \mathbf{Y}_\star) - R) - R - C \\ &= \gamma \cdot \text{Tr}(\mathbf{X}_\star^\top \mathbf{A} \mathbf{Y}_\star) - (1 + \gamma) \cdot R - C \\ &\geq \gamma \cdot \text{Tr}(\mathbf{X}_\star^\top \mathbf{A} \mathbf{Y}_\star) - 2 \cdot R - C, \end{aligned}$$

where the first inequality follows from (24) the second from (21), the third from (25), and the last from the fact that  $R \geq 0$ . This concludes the proof.  $\square$

**Lemma 3.3.** *For any  $\mathbf{A} \in \mathbb{R}^{m \times n}$ , let*

$$(\mathbf{X}_\star, \mathbf{Y}_\star) \triangleq \arg \max_{\mathbf{X} \in \mathcal{X}, \mathbf{Y} \in \mathcal{Y}} \text{Tr}(\mathbf{X}^\top \mathbf{A} \mathbf{Y}),$$

where  $\mathcal{X} \subseteq \mathbb{R}^{m \times k}$  and  $\mathcal{Y} \subseteq \mathbb{R}^{n \times k}$  are sets satisfying the conditions of Lemma 3.2. Let  $\tilde{\mathbf{A}}$  be a rank- $r$  approximation of  $\mathbf{A}$ , and  $\tilde{\mathbf{X}} \in \mathcal{X}$ ,  $\tilde{\mathbf{Y}} \in \mathcal{Y}$  be the output of Alg. 1 with input  $\tilde{\mathbf{A}}$  and accuracy  $\epsilon$ . Then,

$$\begin{aligned} \text{Tr}(\mathbf{X}_\star^\top \mathbf{A} \mathbf{Y}_\star) - \text{Tr}(\tilde{\mathbf{X}}^\top \tilde{\mathbf{A}} \tilde{\mathbf{Y}}) &\leq 2 \cdot \left( \epsilon \sqrt{k} \cdot \|\tilde{\mathbf{A}}\|_2 + \|\mathbf{A} - \tilde{\mathbf{A}}\|_2 \right) \cdot \mu_{\mathcal{X}} \cdot \mu_{\mathcal{Y}}, \end{aligned}$$

where  $\mu_{\mathcal{X}} \triangleq \max_{\mathbf{X} \in \mathcal{X}} \|\mathbf{X}\|_F$  and  $\mu_{\mathcal{Y}} \triangleq \max_{\mathbf{Y} \in \mathcal{Y}} \|\mathbf{Y}\|_F$ .

*Proof.* The proof follows the approximation guarantees of Alg. 1 in Lemma 3.2 and Lemma A.6.  $\square$

## B Correctness of Algorithm 2

In the sequel, we use  $\|\mathbf{X}\|_{\infty,1}$  to denote the maximum of the  $\ell_1$  norm of the rows of  $\mathbf{X}$ . When  $\mathbf{X} \in \{0,1\}^{d \times k}$ , the constraint  $\|\mathbf{X}\|_{\infty,1} = 1$  effectively implies that each row of  $\mathbf{X}$  has exactly one nonzero entry.

**Lemma 4.4.** *Let  $\mathcal{X} \triangleq \{\mathbf{X} \in \{0,1\}^{d \times k} : \|\mathbf{X}\|_{\infty,1} = 1\}$ . For any  $d \times k$  real matrix  $\mathbf{L}$ , Algorithm 2 outputs*

$$\tilde{\mathbf{X}} = \arg \max_{\mathbf{X} \in \mathcal{X}} \text{Tr}(\mathbf{X}^\top \mathbf{L}),$$

in time  $O(k \cdot d)$

*Proof.* By construction, each row of  $\mathbf{X}$  has exactly one nonzero entry. Let  $j_i \in [k]$  denote the index of the nonzero entry in the  $i$ th row of  $\mathbf{X}$ . For any  $\mathbf{X} \in \mathcal{X}$ ,

$$\begin{aligned} \text{Tr}(\mathbf{X}^\top \mathbf{L}) &= \sum_{j=1}^k \mathbf{x}_j^\top \mathbf{l}_j = \sum_{j=1}^k \sum_{i \in \text{supp}(\mathbf{x}_j)} 1 \cdot L_{ij} \\ &= \sum_{i=1}^d L_{ij_i} \leq \sum_{i=1}^d \max_{j \in [k]} L_{ij}. \end{aligned} \quad (26)$$

Algorithm 2 achieves equality in (26) due to the choice of  $j_i$  in line 3. Finally, the running time follows immediately from the  $O(k)$  time required to determine the maximum entry of each of the  $d$  rows of  $\mathbf{L}$ .  $\square$

## C Auxiliary Lemmas

**Lemma C.7.** *Let  $a_1, \dots, a_n$  and  $b_1, \dots, b_n$  be  $2n$  real numbers and let  $p$  and  $q$  be two numbers such that  $1/p + 1/q = 1$  and  $p > 1$ . We have*

$$\left| \sum_{i=1}^n a_i b_i \right| \leq \left( \sum_{i=1}^n |a_i|^p \right)^{1/p} \cdot \left( \sum_{i=1}^n |b_i|^q \right)^{1/q}.$$

**Lemma C.8.** *For any  $\mathbf{A}, \mathbf{B} \in \mathbb{R}^{n \times k}$ ,*

$$|\langle \mathbf{A}, \mathbf{B} \rangle| \triangleq |\text{Tr}(\mathbf{A}^\top \mathbf{B})| \leq \|\mathbf{A}\|_F \|\mathbf{B}\|_F.$$

*Proof.* Treating  $\mathbf{A}$  and  $\mathbf{B}$  as vectors, the lemma follows immediately from Lemma C.7 for  $p = q = 2$ .  $\square$

**Lemma C.9.** *For any two real matrices  $\mathbf{A}$  and  $\mathbf{B}$  of appropriate dimensions,*

$$\|\mathbf{AB}\|_F \leq \min\{\|\mathbf{A}\|_2 \|\mathbf{B}\|_F, \|\mathbf{A}\|_F \|\mathbf{B}\|_2\}.$$

*Proof.* Let  $\mathbf{b}_i$  denote the  $i$ th column of  $\mathbf{B}$ . Then,

$$\begin{aligned} \|\mathbf{AB}\|_F^2 &= \sum_i \|\mathbf{A}\mathbf{b}_i\|_2^2 \leq \sum_i \|\mathbf{A}\|_2^2 \|\mathbf{b}_i\|_2^2 \\ &= \|\mathbf{A}\|_2^2 \sum_i \|\mathbf{b}_i\|_2^2 = \|\mathbf{A}\|_2^2 \|\mathbf{B}\|_F^2. \end{aligned}$$

Similarly, using the previous inequality,

$$\|\mathbf{AB}\|_F^2 = \|\mathbf{B}^\top \mathbf{A}^\top\|_F^2 \leq \|\mathbf{B}^\top\|_2^2 \|\mathbf{A}^\top\|_F^2 = \|\mathbf{B}\|_2^2 \|\mathbf{A}\|_F^2.$$

The desired result follows combining the two upper bounds.  $\square$

**Lemma C.10.** *For any real  $m \times k$  matrix  $\mathbf{X}$ ,  $m \times n$  matrix  $\mathbf{A}$ , and  $n \times k$  matrix  $\mathbf{Y}$ ,*

$$|\text{Tr}(\mathbf{X}^\top \mathbf{A} \mathbf{Y})| \leq \|\mathbf{X}\|_F \cdot \|\mathbf{A}\|_2 \cdot \|\mathbf{Y}\|_F.$$

*Proof.* We have

$$|\text{Tr}(\mathbf{X}^\top \mathbf{A} \mathbf{Y})| \leq \|\mathbf{X}\|_F \cdot \|\mathbf{A} \mathbf{Y}\|_F \leq \|\mathbf{X}\|_F \cdot \|\mathbf{A}\|_2 \cdot \|\mathbf{Y}\|_F,$$

with the first inequality following from Lemma C.8 on  $|\langle \mathbf{X}, \mathbf{A} \mathbf{Y} \rangle|$  and the second from Lemma C.9.  $\square$

**Lemma C.11.** *For any real  $m \times n$  matrix  $\mathbf{A}$ , and pair of  $m \times k$  matrix  $\mathbf{X}$  and  $n \times k$  matrix  $\mathbf{Y}$  such that  $\mathbf{X}^\top \mathbf{X} = \mathbf{I}_k$  and  $\mathbf{Y}^\top \mathbf{Y} = \mathbf{I}_k$  with  $k \leq \min\{m, n\}$ , the following holds:*

$$|\text{Tr}(\mathbf{X}^\top \mathbf{A} \mathbf{Y})| \leq \sqrt{k} \cdot \left( \sum_{i=1}^k \sigma_i^2(\mathbf{A}) \right)^{1/2}.$$

*Proof.* By Lemma C.8,

$$\begin{aligned} |\langle \mathbf{X}, \mathbf{A} \mathbf{Y} \rangle| &= |\text{Tr}(\mathbf{X}^\top \mathbf{A} \mathbf{Y})| \\ &\leq \|\mathbf{X}\|_F \cdot \|\mathbf{A} \mathbf{Y}\|_F = \sqrt{k} \cdot \|\mathbf{A} \mathbf{Y}\|_F. \end{aligned}$$

where the last inequality follows from the fact that  $\|\mathbf{X}\|_F^2 = \text{Tr}(\mathbf{X}^\top \mathbf{X}) = \text{Tr}(\mathbf{I}_k) = k$ . Further, for any  $\mathbf{Y}$  such that  $\mathbf{Y}^\top \mathbf{Y} = \mathbf{I}_k$ ,

$$\|\mathbf{A} \mathbf{Y}\|_F^2 \leq \max_{\substack{\hat{\mathbf{Y}} \in \mathbb{R}^{n \times k} \\ \hat{\mathbf{Y}}^\top \hat{\mathbf{Y}} = \mathbf{I}_k}} \|\mathbf{A} \hat{\mathbf{Y}}\|_F^2 = \sum_{i=1}^k \sigma_i^2(\mathbf{A}). \quad (27)$$

Combining the two inequalities, the result follows.  $\square$

**Lemma C.12.** *For any real  $m \times n$  matrix  $\mathbf{A}$ , and any  $k \leq \min\{m, n\}$ ,*

$$\max_{\substack{\mathbf{Y} \in \mathbb{R}^{n \times k} \\ \mathbf{Y}^\top \mathbf{Y} = \mathbf{I}_k}} \|\mathbf{A} \mathbf{Y}\|_F = \left( \sum_{i=1}^k \sigma_i^2(\mathbf{A}) \right)^{1/2}.$$

*The above equality is realized when the  $k$  columns of  $\mathbf{Y}$  coincide with the  $k$  leading right singular vectors of  $\mathbf{A}$ .*

*Proof.* Let  $\mathbf{U}\Sigma\mathbf{V}^\top$  be the singular value decomposition of  $\mathbf{A}$ , with  $\Sigma_{jj} = \sigma_j$  being the  $j$ th largest singular value of  $\mathbf{A}$ ,  $j = 1, \dots, d$ , where  $d \triangleq \min\{m, n\}$ . Due to the invariance of the Frobenius norm under unitary multiplication,

$$\|\mathbf{A}\mathbf{Y}\|_{\text{F}}^2 = \|\mathbf{U}\Sigma\mathbf{V}^\top\mathbf{Y}\|_{\text{F}}^2 = \|\Sigma\mathbf{V}^\top\mathbf{Y}\|_{\text{F}}^2. \quad (28)$$

Continuing from (28),

$$\begin{aligned} \|\Sigma\mathbf{V}^\top\mathbf{Y}\|_{\text{F}}^2 &= \text{Tr}(\mathbf{Y}^\top\mathbf{V}\Sigma^2\mathbf{V}^\top\mathbf{Y}) \\ &= \sum_{i=1}^k \mathbf{y}_i^\top \left( \sum_{j=1}^d \sigma_j^2 \cdot \mathbf{v}_j \mathbf{v}_j^\top \right) \mathbf{y}_i \\ &= \sum_{j=1}^d \sigma_j^2 \cdot \sum_{i=1}^k (\mathbf{v}_j^\top \mathbf{y}_i)^2. \end{aligned}$$

Let  $z_j \triangleq \sum_{i=1}^k (\mathbf{v}_j^\top \mathbf{y}_i)^2$ ,  $j = 1, \dots, d$ . Note that each individual  $z_j$  satisfies

$$0 \leq z_j \triangleq \sum_{i=1}^k (\mathbf{v}_j^\top \mathbf{y}_i)^2 \leq \|\mathbf{v}_j\|^2 = 1,$$

where the last inequality follows from the fact that the columns of  $\mathbf{Y}$  are orthonormal. Further,

$$\begin{aligned} \sum_{j=1}^d z_j &= \sum_{j=1}^d \sum_{i=1}^k (\mathbf{v}_j^\top \mathbf{y}_i)^2 = \sum_{i=1}^k \sum_{j=1}^d (\mathbf{v}_j^\top \mathbf{y}_i)^2 \\ &= \sum_{i=1}^k \|\mathbf{y}_i\|^2 = k. \end{aligned}$$

Combining the above, we conclude that

$$\|\mathbf{A}\mathbf{Y}\|_{\text{F}}^2 = \sum_{j=1}^d \sigma_j^2 \cdot z_j \leq \sigma_1^2 + \dots + \sigma_k^2. \quad (29)$$

Finally, it is straightforward to verify that if  $\mathbf{y}_i = \mathbf{v}_i$ ,  $i = 1, \dots, k$ , then (29) holds with equality.  $\square$

**Lemma C.13.** *For any real  $m \times n$  matrix  $\mathbf{A}$ , let  $\sigma_i(\mathbf{A})$  be the  $i$ th largest singular value. For any  $r, k \leq \min\{m, n\}$ ,*

$$\sum_{i=r+1}^{r+k} \sigma_i(\mathbf{A}) \leq \frac{k}{\sqrt{r+k}} \|\mathbf{A}\|_{\text{F}}.$$

*Proof.* By the Cauchy-Schwartz inequality,

$$\begin{aligned} \sum_{i=r+1}^{r+k} \sigma_i(\mathbf{A}) &= \sum_{i=r+1}^{r+k} |\sigma_i(\mathbf{A})| \leq \left( \sum_{i=r+1}^{r+k} \sigma_i^2(\mathbf{A}) \right)^{1/2} \|\mathbf{1}_k\|_2 \\ &= \sqrt{k} \cdot \left( \sum_{i=r+1}^{r+k} \sigma_i^2(\mathbf{A}) \right)^{1/2}. \end{aligned}$$

Note that  $\sigma_{r+1}(\mathbf{A}), \dots, \sigma_{r+k}(\mathbf{A})$  are the  $k$  smallest among the  $r+k$  largest singular values. Hence,

$$\begin{aligned} \sum_{i=r+1}^{r+k} \sigma_i^2(\mathbf{A}) &\leq \frac{k}{r+k} \sum_{i=1}^{r+k} \sigma_i^2(\mathbf{A}) \leq \frac{k}{r+k} \sum_{i=1}^l \sigma_i^2(\mathbf{A}) \\ &= \frac{k}{r+k} \|\mathbf{A}\|_{\text{F}}^2. \end{aligned}$$

Combining the two inequalities, the desired result follows.  $\square$

**Corollary 1.** *For any real  $m \times n$  matrix  $\mathbf{A}$ , the  $r$ th largest singular value  $\sigma_r(\mathbf{A})$  satisfies  $\sigma_r(\mathbf{A}) \leq \|\mathbf{A}\|_{\text{F}}/\sqrt{r}$ .*

*Proof.* It follows immediately from Lemma C.13.  $\square$

First, we define the  $\|\cdot\|_{\infty,2}$  norm of a matrix as the  $l_2$  norm of the column with the maximum  $l_2$  norm, i.e., for an  $r \times k$  matrix  $\mathbf{C}$

$$\|\mathbf{C}\|_{\infty,2} = \max_{1 \leq i \leq k} \|\mathbf{c}_i\|_2.$$

Note that

$$\begin{aligned} \|\mathbf{C}\|_{\text{F}}^2 &= \sum_{i=1}^k \|\mathbf{c}_i\|_2^2 \leq k \cdot \max_{1 \leq i \leq k} \|\mathbf{c}_i\|_2^2 \\ &= k \cdot \left( \max_{1 \leq i \leq k} \|\mathbf{c}_i\|_2 \right)^2 = k \cdot \|\mathbf{C}\|_{\infty,2}^2. \end{aligned} \quad (30)$$
